# Supplementary material
Source: PubMed Central journal article supplement (PMC198529)
Supplement: JCI0318714sd.pdf [file JCI0318714sd.pdf]

Primers (ADN génomique) (AUTHOR: Please provide an English translation, spelling out ADN.)

(AUTHOR: Should there be hyphens between I $\kappa$ B $\alpha$  and E1F?)

I $\kappa$ B $\alpha$ E1F: 5'-GTTTATAGGGCGCCGCGGCGG-3'

I $\kappa$ B $\alpha$ E1R: 5'-CGTCCCGCCCTCCCGACGAC-3'

I $\kappa$ B $\alpha$ E2F: 5'-TTGCGCAATCCCCCGCAGCCC-3'

I $\kappa$ B $\alpha$ E2R: 5'-GCTACATCAGCTACGTCCCA-3'

I $\kappa$ B $\alpha$ E3F: 5'-AGGGGAACTCGGGGTGTGGGT-3'

I $\kappa$ B $\alpha$ E3R: 5'-TTCTCCACGTCACCTGCCCT-3'

I $\kappa$ B $\alpha$ E4F: 5'-GGAGTGAGGGTTGAAACAGGT-3'

I $\kappa$ B $\alpha$ E4R: 5'-GCTCACAACATAAGCACGAGG-3'

I $\kappa$ B $\alpha$ E5F: 5'-AAATGCAGCCATAAGCATCTC-3'

I $\kappa$ B $\alpha$ E5R: 5'-AAGGGAATGGCACCTCATTAG-3'

I $\kappa$ B $\alpha$ E6F: 5'-GGCAGAGCTCCGCTCCGGAAG-3'

I $\kappa$ B $\alpha$ E6R: 5'-AGTCCATGTTCTTTCAGCCCC-3'

Primers (cDNA)

I $\kappa$ B $\alpha$ AF: 5'-CAGCGCACCCGCAGCAGCGC-3'

I $\kappa$ B $\alpha$ AR: 5'-GGCCAGGCAGCCCTGCTCACA-3'

I $\kappa$ B $\alpha$ BF: 5'-CCTGAGCTCCGAGACTTTCGA-3'

I $\kappa$ B $\alpha$ BR: 5'-GGGAGAATAGCCCTGGTAGGT-3'

I $\kappa$ B $\alpha$ CF: 5'-TCACTCCTGTTGAAGTGTGGG-3'

I $\kappa$ B $\alpha$ CR: 5'-AGTGTGGATATAAGTACACCC-3'
